# Supplementary material for: Multi-omics and temporal dynamics profiling reveal disruption of central metabolism inHelicobacter pylorion bismuth treatment
Source: Royal Society of Chemistry journal article supplement (doi:10.1039/c8sc01668b), 2018-01-01
Supplement: c8sc01668b1.pdf [file c8sc01668b1.pdf]

*Electronic Supplementary Information*

**Multi-omics and temporal dynamics profiling reveal disruption of central metabolism in *Helicobacter pylori* on bismuth treatment**

Bingjie Han,<sup>a</sup> Zhen Zhang,<sup>a</sup> Yanxuan Xie,<sup>a</sup> Xuqiao Hu,<sup>b</sup> Haibo Wang,<sup>b</sup> Wei Xia,<sup>a</sup> Yulan Wang,<sup>c</sup> Hongyan Li,<sup>b</sup> Yuchuan Wang<sup>\*a</sup> and Hongzhe Sun<sup>\*ab</sup>

<sup>a</sup>School of Chemistry, Sun Yat-sen University, Guangzhou, 510275, P.R. China;

<sup>b</sup>Department of Chemistry, The University of Hong Kong, Hong Kong, P.R. China;

<sup>c</sup>CAS Key Laboratory of Magnetic Resonance in Biological Systems, State Key Laboratory of Magnetic Resonance and Atomic and Molecular Physics, Wuhan Institute of Physics and Mathematics, Chinese Academy of Sciences, Wuhan, 430071, P. R. China.

\*Correspondence and request materials should be addressed to Y.W. (e-mail: wangych55@mail.sysu.edu.cn) or H.S. (e-mail: hsun@hku.hk).

## Supplementary Methods and Figures

**Reagents and Instrumentation.** All chemicals used were of analytical grade. Columbia blood agar base was purchased from Thermo Scientific. Brucella broth was purchased from BD (Difco). Deuterioxide (NMR quality) was purchased from Sigma. All solutions and glasswares were sterilized by autoclaving at 121 °C for 20 mins, at 15 psi. <sup>1</sup>H and 2D NMR spectra were recorded on a Bruker AV-600 spectrometer equipped with a 5 mm CPTCI probe (Bruker, BioSpin, Germany). An Agilent 7890A / 5975C GC-MS system was used for metabolite profiling.

**Culture of *H. pylori*.** *Helicobacter pylori* 26695 was obtained from American Type Culture Collection (ATCC 700392). Bacterial glycerol stock was recovered from -80 °C and cultured on Columbia agar (Oxoid) plates supplemented with 7% laked horse blood and selective antibiotics (Oxoid) at 37 °C for 3 days under microaerobic conditions (5% CO<sub>2</sub>, 4% O<sub>2</sub> and 91% N<sub>2</sub>) generated by CampyGen (Oxoid). Bacterial cells were then transferred into freshly prepared Brucella Broth medium supplemented with 0.2% β-cyclodextrin (Sigma) and cultured at 37 °C in a bacterial culture shaker with speed setting to 105 rpm. *H. pylori* grown to early log phase were treated by CBS (colloidal bismuth subcitrate, Livzon Pharmaceutical Ltd) and harvested at appointed time points by centrifugation at 4,000 g for 15 mins at 4 °C for further experiments.

**Transcriptomics Assay and Data Processing.** Total RNA was isolated from *H. pylori* treated with different concentrations of CBS for 12 h using total RNA isolation system (Promega). RNA concentration was measured using Qubit RNA assay kit in Qubit 2.0 flurometer (Life Technologies, CA, USA). The RNA degradation and contamination was monitored by 1% agarose gel electrophoresis.

For gene expression arrays, quality control and quantification of gene expression levels were performed with HTSeq v0.6.1 (1). Briefly, the initial preprocessing of the raw intensity data were firstly processed through in-house perl scripts to remove reads with low quality, and then FPKM of each gene was calculated based on the length of the gene and reads count mapped to this gene. Differential expression analysis between two groups (three biological replicates per condition) was performed using the DESeq R package (1.18.0). DESeq provides statistical routines for determining differential expression in digital gene expression data using a model based on the negative binomial distribution. The resulting *p*-values were adjusted using the Benjamini and Hochberg's approach for controlling the false discovery rate. Genes with an adjusted *p*-value < 0.05 found by DESeq were assigned as differentially expressed. Subsequent

enrichment analysis including Gene Ontology (GO) and KEGG pathways enrichment analysis were implemented by the GOrseq R package and KEGG database resource.

**NMR Acquisition and Data Processing.** Sample preparation procedure for one-dimensional  $^1\text{H}$  NMR was as previously described with minor modification (2). Bacteria in mid-log phase were collected with cold PBS washing for three times, then extracted twice with 600  $\mu\text{L}$  of ice-cold methanol /  $\text{H}_2\text{O}$  (2 : 1 v/v) extraction buffer using a tissue-lyser. After centrifugation at 16,000 g for 10 min at 4  $^\circ\text{C}$ , the combined supernatants were lyophilized after removal of methanol under vacuum. The extracts were then reconstituted in 600  $\mu\text{L}$  of phosphate buffer (1.5 M, pH 7.4, TSP 0.05%,  $\text{K}_2\text{HPO}_4$  /  $\text{NaH}_2\text{PO}_4$  = 4:1) for NMR analyses.

$^1\text{H}$  NMR spectra of bacteria were acquired at 298 K with a Bruker Avance III 600 MHz NMR spectrometer. A total of 256 transients spanning a spectral width of 8992.8  $\text{Hz}$  were collected with a relaxation delay of 2.0 s, an acquisition time of 1.82 s, and a mixing time of 100 ms, while water suppression was achieved by using a standard presaturation pulse sequence. For assignment purposes, a range of two-dimensional NMR spectra, including *J*-resolved, total correlation spectroscopy (TOCSY), correlation spectroscopy (COSY), homo- and heteronuclear correlation spectroscopy were also acquired for selected bacterial samples.

The  $^1\text{H}$  NMR spectra ( $\delta$  10 - 0.2) were manually adjusted for phase and baseline distortions using TOPSPIN (version 2.1, Bruker, Biospin) and referenced to the TSP signal ( $\delta$  = 0.0). The spectral region  $\delta$  0.2 - 9.8 was automatically integrated into regions with equal widths of 0.002 ppm (1.2  $\text{Hz}$ ) using AMIX software package (version 3.8, Bruker-Biospin, Germany). To remove the effects of variation in the suppression of the water resonance, the region from  $\delta$  5.0 through 4.7 was set to zero integral (3). The data were then normalized to total integrated intensity and par scaling was applied before pattern recognition analyses. Principal component analysis (PCA) and orthogonal projection to latent structures discriminant analysis (OPLS-DA) were carried out using the SIMCA-P software package (version 13.0, Umetrics, Sweden). The validity of all models was additionally ensured with CV-ANOVA ( $p < 0.05$ ) and permutation tests (200 permutations). Finally, the data were visualized by the color-coded correlation coefficient plots generated in MATLAB (R2015b, The Mathworks Inc., Natwick, USA). A correlation coefficient of  $|r| > 0.602$  was considered to be statistically significant ( $p < 0.05$ ).

**GC-MS Acquisition and Data Processing.** The extraction procedure was used as a previous protocol with modification (4). The bacteria in mid-log phase of control group and dosing groups were adjusted to the same amount according to the  $\text{OD}_{600}$ . Then cold methanol was added to stop the metabolism of bacteria. Cell pellets were thawed on ice and then resuspended

in 1 mL of methanol by pipetting. The solution was lysed by ultrasonication for 3 min (5 s pulses, 10 s stops) at a 15 % power setting. After centrifugation at 12,000 g for 10 min at 4 °C, the supernatant was transferred to new tubes. Then the supernatant containing 5 µg ribitol as an internal standard was dried using a rotary vacuum centrifuge device.

Samples were derivatized according to the literature (5). Briefly, 80 µL of 20 mg/mL methoxylamine (Sigma Aldrich) in pyridine were added to the dried sample and incubated for 90 min at 37 °C, followed by the addition of 80 µL of N-methyl-N-trimethylsilyltrifluoroacetamide (MSTFA, Sigma Aldrich) and incubated at 37 °C for another 30 min. The 140 µL of derivated samples were transferred to the GC-MS autosampler vial. Analysis was carried out on an Agilent Technologies 7890 gas chromatograph coupled to mass spectrometry 5975C which was equipped with a HP-5MS fused-silica capillary column (30 m × 0.25 mm i.d., film thickness 0.25 µm, Agilent J&W Scientific, Folsom, CA). Helium was used as the carrier gas at a constant flow of 1 mL/min. Electron impact ionization (EI) mode was selected, while the ionization energy was 70 eV and the mass range scanned was 33 - 550 m/z at a rate of 2 scan/s. 1 µL of derivatized sample was injected to the injector at 280 °C, and the initial column temperature of 85 °C was held for 3 min and then ramped at 20 °C/min to 310 °C and held for 7 min. Two technical replicates were prepared for each sample.

R statistical package, MSD chemstation with NIST MS search 2.0 program and internal standards were used to perform the spectral deconvolution and calibration. Deconvolution and alignment with quantification and identification of metabolites from the GC-MS spectra were conducted through eRah and National Institute of Standards and Technology (NIST 11) Mass Spectra Library (6). The resulting data matrix was normalized to the integrated peak area of ribitol and the total spectral intensity of each sample. Multivariate statistical analysis including principal component analysis (PCA) and orthogonal partial least squares discriminant analysis (OPLS-DA) were applied to reduce the high dimension of the data set. One-way ANOVA followed by Tukey's multiple comparisons test in SPSS statistics (version 24) was used to test the significance of metabolites. GraphPad Prism (version 5.01) was used to draw the histogram and the scatter plot. MetaboAnalyst 3.0 was employed to analyze the statistically enriched pathways over the identified metabolites (7).

**Quantitative real-time PCR.** The total RNA was extracted from *H. pylori* treated with different concentrations of CBS using the total RNA extraction kit as described above in transcriptomics assay. The RNA concentration and purity were estimated with NanoDrop 2000

(Thermo Scientific, Waltham, MA) by measuring absorbance at 260 and 280 nm, respectively. Then the extracted RNA was used to synthesize cDNAs using the GoScript reverse transcriptase system (Promega) according to the manufacturer's instructions. Real-time PCR was performed in 20  $\mu$ L reaction volume using an ABI step one plus thermal cycler (Applied Biosystems, Foster City, CA). The thermal cycling conditions were 95 °C for 10 min, followed by 40 cycles at 95 °C for 15 sec and 60 °C for 1 min. Melt curve analysis and agarose gel electrophoresis were then conducted to monitor the purity of the PCR products. 16S rRNA of *H. pylori* was used as an endogenous control. The expression levels of the target genes (Table S4) were calculated according to the amount of cycles in three replications.

**Evaluation of the activities of key enzymes in TCA cycle.** Activities of citrate synthase, aconitase, isocitrate dehydrogenase, fumarase and malate dehydrogenase were evaluated by the corresponding enzymatic activity colorimetric assay kits (Sigma-Aldrich). Citrate synthase activity was measured by monitoring the production of CoA during the synthesis of citrate from oxaloacetate. Aconitase was measured by monitoring the production of isocitrate during the isomerization of citrate to isocitrate. Isocitrate dehydrogenase activity was measured by monitoring the production of NADPH during the conversion of isocitrate to  $\alpha$ -ketoglutarate using isocitrate and NADP as substrates. Fumarase activity was measured by monitoring the production of NADH during the hydration of fumarate to malate and a further transition step for NADH production. Malate dehydrogenase activity was measured by monitoring the production of NADH during the oxidation of malate to oxaloacetate. In brief, equal amounts of cells were collected by centrifugation, washed, and then resuspended in lysate buffer (from the assay kits). Following centrifugation, 50  $\mu$ L of supernatant was transferred to 96-well plate, after the addition of substrates and developer, activities of different enzymes in *H. pylori* TCA cycle were determined by colorimetric assay. The standard curves were prepared according to kit instructions.

**Measurement of ATP.** Cellular ATP concentrations of *H. pylori* cells exposed to CBS were measured with BacTiter-Glo Microbial Cell Viability Assay (Promega) according to the manufacturer's instruction. Generally, cells were harvested, washed with PBS and diluted to  $1 \times 10^8$  cells/mL based on OD<sub>600</sub>. To an aliquot of 100  $\mu$ L culture, 100  $\mu$ L of CellTiter-Glo reagent were added. The mixture was incubated at room temperature for 15 min and then the luminescence was measured on Biotek cytation 3. A standard curve was simultaneously constructed using 10-fold serial dilutions of ATP in the range of 1  $\mu$ M to 10 pM.

**Urease activity assay.** *H. pylori* strains were cultured in Brucella Broth medium containing 0.2%  $\beta$ -Cyclodextrin at 37 °C in the presence of 80  $\mu$ g/ml CBS. *H. pylori* cells were harvested at different time points and washed twice with 1 mL 50 mM Hepes (pH 7.5) and re-suspended in 800  $\mu$ L of the same buffer. Cells were lysed, and 10  $\mu$ L supernatants of the lysates were diluted in 250  $\mu$ L 50 mM Hepes buffer (pH 7.5) containing 25 mM urea and incubated in 37 °C for 20 min to allow ammonia to be released. The phenol-hypochlorite assay was used to quantify the amount of ammonia. Meanwhile, the concentration of total proteins was measured by BCA protein quantification kit (23225, Thermo Scientific). The urease activity was defined as nmol ammonia produced per min per mg of total proteins ( $\text{nmol} \cdot \text{min}^{-1} \cdot \mu\text{g}^{-1}$ ) in three biological replicates.

**ROS detection.** *H. pylori* was grown to log-phase and diluted to an OD<sub>600</sub> of 0.3 in fresh media. For ROS analysis, cells with or without CBS treatment were taken at the indicated time points, and cells were harvested at equal amounts, then washed twice with PBS. After centrifugation at 4,000 g for 10 min, cell pellets were incubated with CM-H<sub>2</sub>DCFDA (10  $\mu$ M) for 30 min at 37 °C in dark. Cells were then harvested and re-suspended in PBS and 200  $\mu$ L suspension was transferred to 96-well plate. The level of ROS was measured by multifunctional microplate reader (Cytation™ 3, Biotek) with 491 nm and 518 nm as excitation wavelength (Ex) and emission wavelength (Em), respectively.

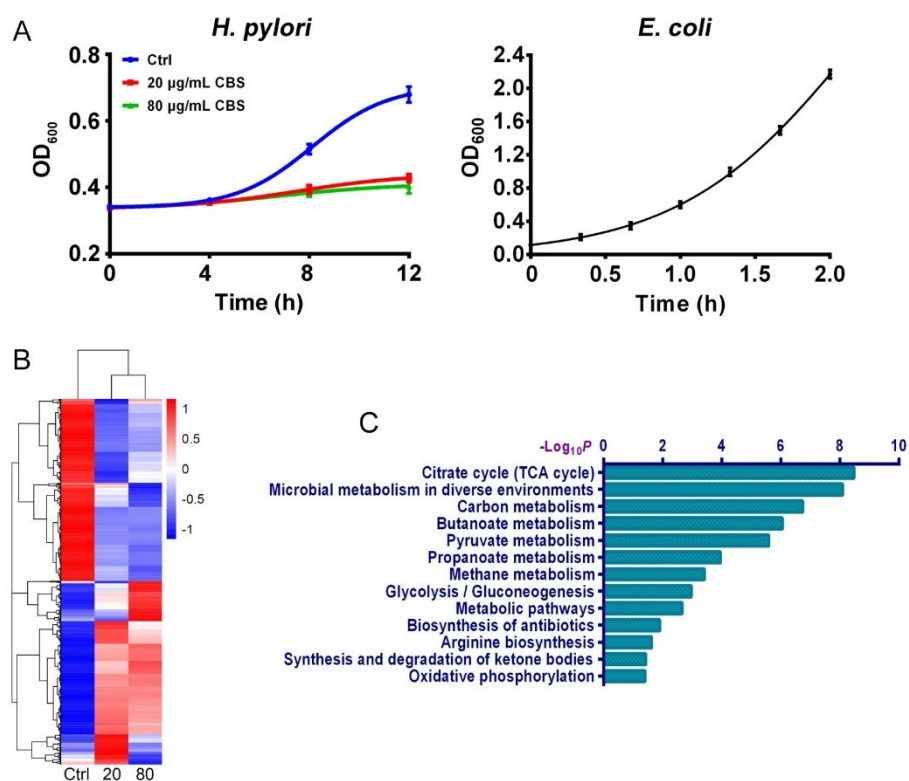

**Fig. S1** (A) Growth curves of *H. pylori* (in Brucella Broth + 0.2%  $\beta$ -cyclodextrin) and *E. coli* (in LB Broth). (B) Cluster analysis of differentially expressed genes in control and CBS treated groups. The cluster map was created based on the normalized log<sub>10</sub> (FPKM+1) values. (C) Enriched pathways of significantly altered common genes of CBS treated groups at a concentration of 20 and 80 µg/mL.

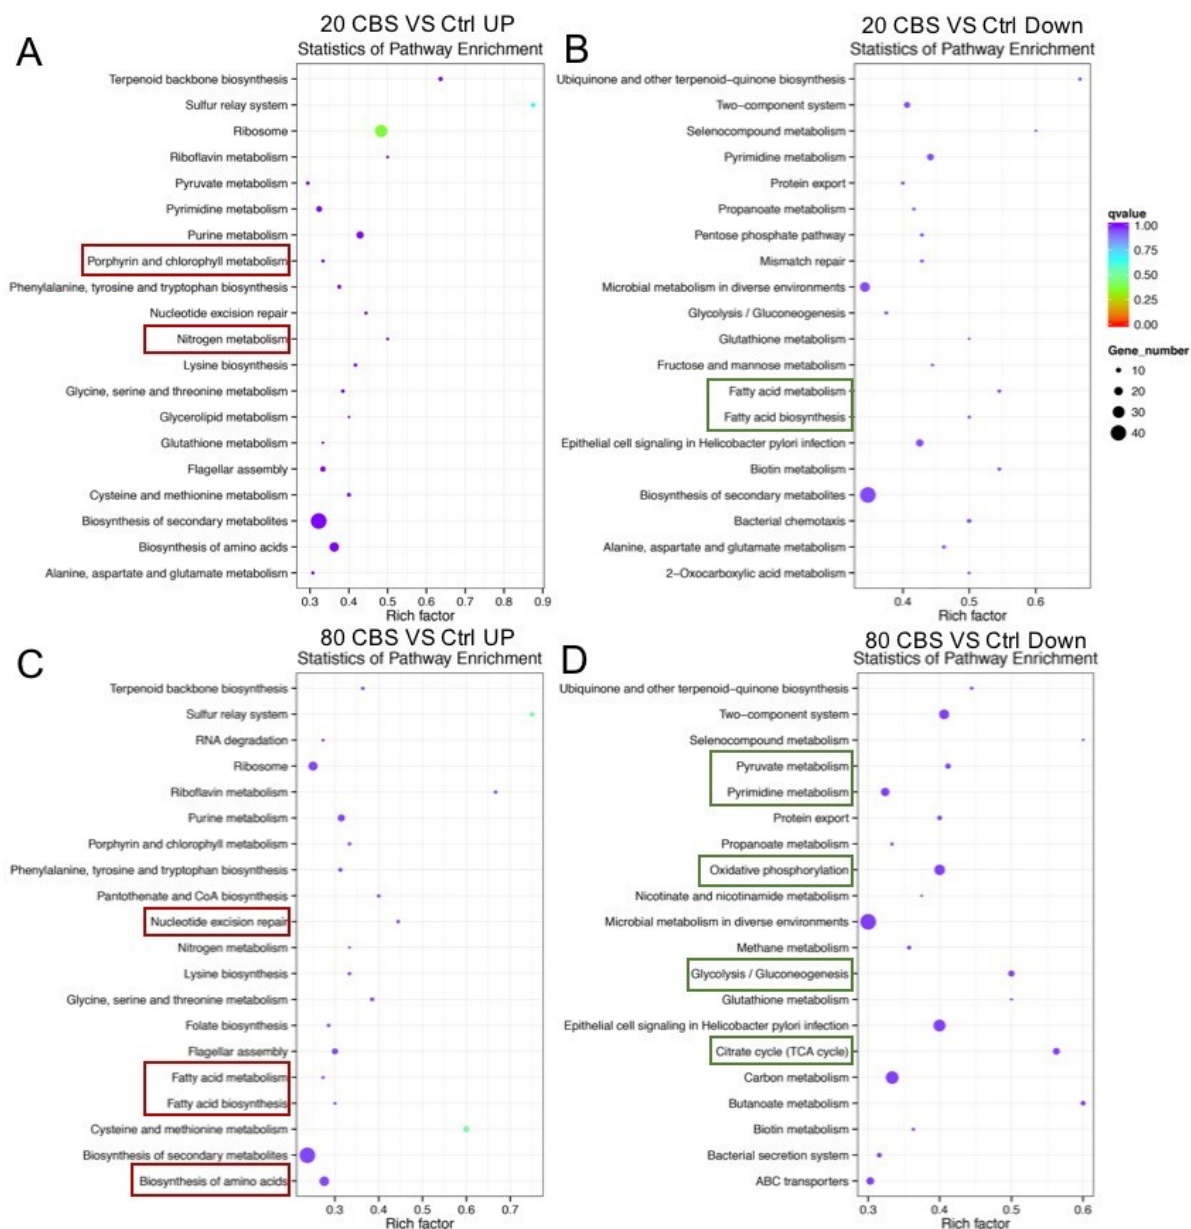

**Fig. S2** Statistical enrichment KEGG pathway scatter plot of differentially expressed genes (DEGs). (A) Up-regulated gene sets of 20  $\mu\text{g/mL}$  CBS treated group. (B) Down-regulated gene sets of 20  $\mu\text{g/mL}$  CBS treated group. (C) Up-regulated gene sets of 80  $\mu\text{g/mL}$  CBS treated group. (D) Down-regulated gene sets of 80  $\mu\text{g/mL}$  CBS treated group.



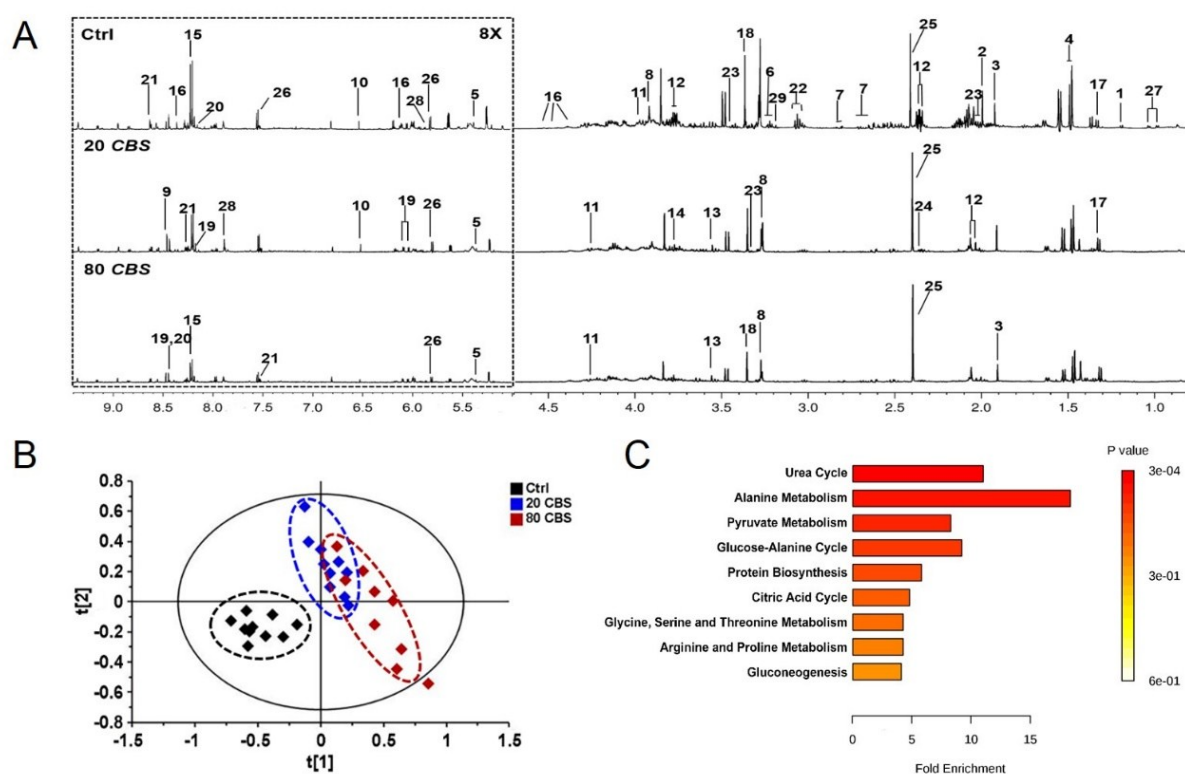

**Fig. S3** NMR-based metabolomics study. (A) Representative 600 MHz  $^1\text{H}$  NMR spectra of aqueous extracts from untreated and CBS-treated *H. pylori* cells. Key: 1. 3-Hydroxybutyrate; 2. Acetamide; 3. Acetate; 4. Alanine (Ala); 5. Allantoin; 6. Arginine (Arg); 7. Aspartate (Asp); 8. Betaine; 9. Formate; 10. Fumarate; 11. Galactarate 12. Glutamate (Glu); 13. Glycine (Gly); 14. Guanidoacetate; 15. Hypoxanthine; 16. Inosine; 17. Lactate; 18. Methanol; 19. Nicotinamide adenine dinucleotide ( $\text{NAD}^+$ ); 20. Nicotinamide adenine dinucleotide phosphate ( $\text{NADP}^+$ ); 21. Nicotinate; 22. Ornithine; 23. Proline (Pro); 24. Pyruvate; 25. Succinate; 26. Uracil; 27. Valine (Val); 28. Xanthosine; 29.  $\beta$ -Alanine. (B) PCA analysis of NMR profiles obtained from control and CBS-treated *H. pylori* metabolite extracts. Each square represents metabolites profiling data from one individual sample. (C) Overview of the enrichment pathway analysis based on metabolites alterations.

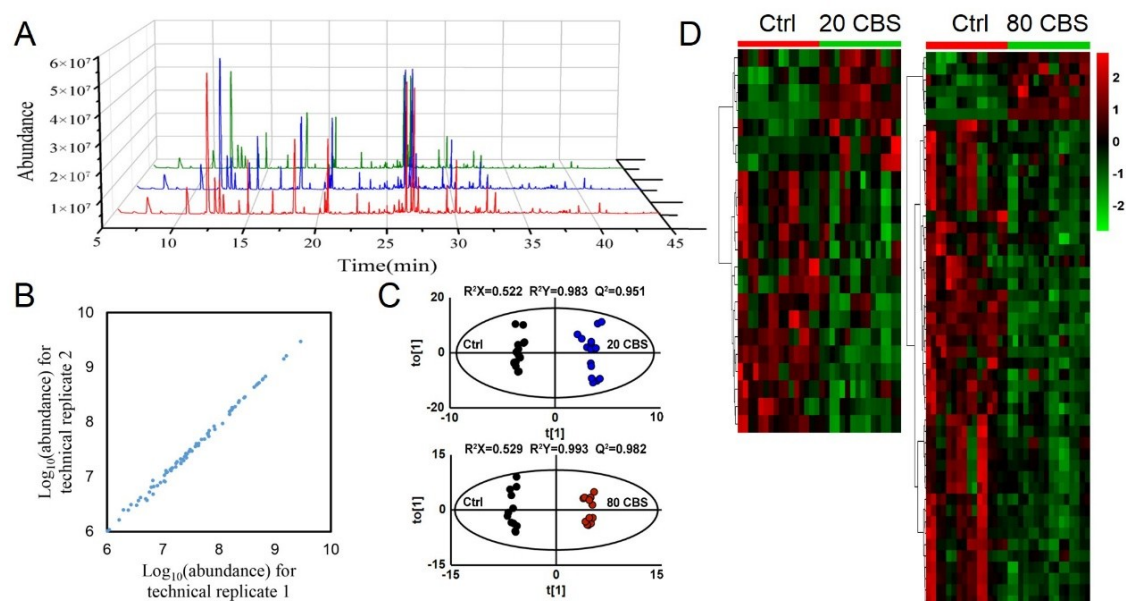

**Fig. S4** GC-MS-based metabolomics study. (A) Representative total ion current (TIC) chromatograms from the control and CBS treatment groups. (B) Reproducibility of the metabolic profiling platform used in the discovery phase. Metabolite abundances quantified in cell samples over two technical replicates are shown. The correlation coefficient between the two technical replicates varies between 0.996 and 0.999. (C) OPLS-DA score plots showing the differences between untreated control group and CBS treated groups. (D) Heat map of the significantly changed metabolites. Red and green indicate increased and decreased metabolite levels relative to the median metabolite level, respectively (see the color scale).

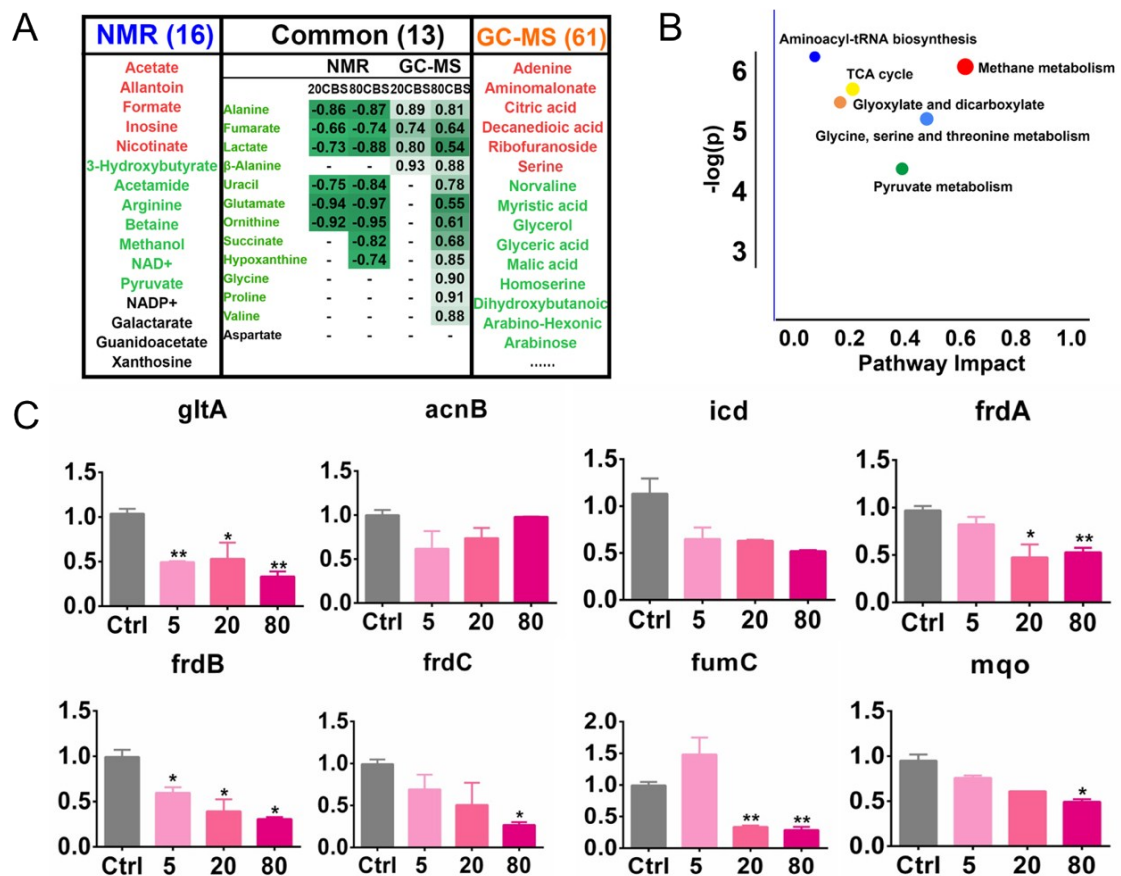

**Fig. S5** (A) The altered metabolites of *H. pylori* treated by CBS versus control as revealed by NMR and GC-MS analyses. Data of the differential metabolites in common are indicated by values of correlation coefficients and relative fold changes of metabolites from NMR and GC-MS analysis, respectively. (B) Pathway mapping based on changed metabolites by integrating NMR and GC-MS data. Colored dots represent enriched KEGG pathways. (C) Transcriptional level of genes in TCA cycle in *H. pylori* treated with CBS for 12 h was determined by qRT-PCR and normalized against 16s rRNA and untreated control (n = 3). Two-tailed t-test was used for all comparisons between two groups. Data are presented as mean  $\pm$  SEM. \*, 0.01 <  $p$  < 0.05 and \*\*, 0.001 <  $p$  < 0.01.

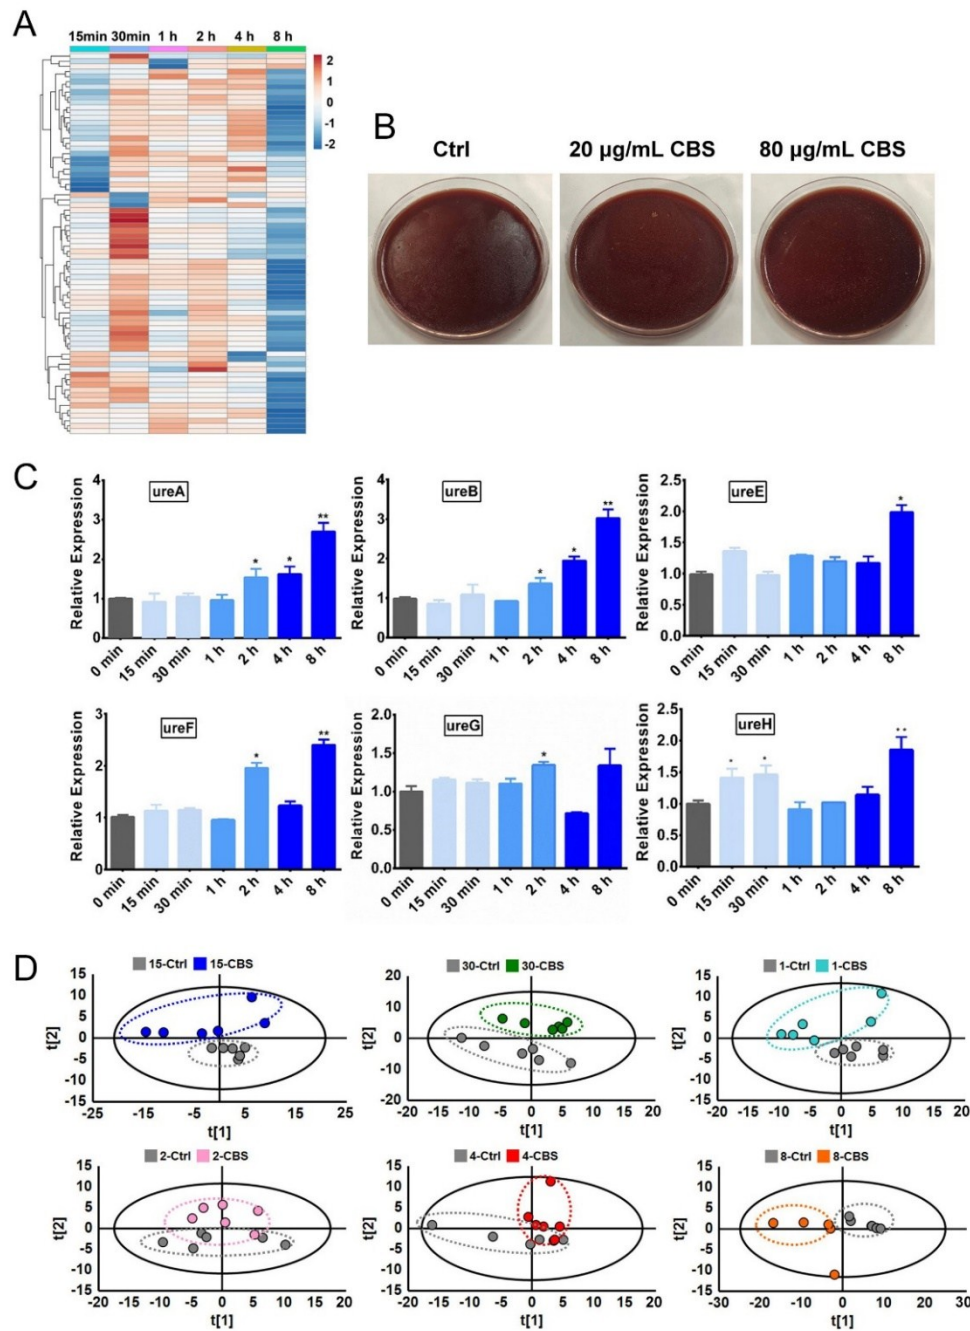

**Fig. S6** (A) Heat map of all metabolites in *H. pylori* at different time points according to the values of log<sub>2</sub> relative fold changes (80 µg/mL CBS treatment versus control group). Abundance of increased metabolites in CBS treated groups is shown in red, while the decreased metabolites are in blue. (B) Growth of *H. pylori* on agar plates after incubation with CBS for 8 h. Growth of *H. pylori* on agar plates could still be observed after 12 h CBS treatment but with smaller colonies. (C) Relative expressions of urease-related genes *ureA*, *ureB*, *ureE*, *ureF*, *ureG* and *ureH* in *H. pylori* cells treated with 80 µg/mL CBS at different time points. Gene expressions were normalized against 16s rRNA and the untreated control. Data are presented as mean ± SEM of triplicate samples from three biological replicates. Two-tailed t-test was used for comparisons between two groups. (\*, 0.01 < p < 0.05 and \*\*, 0.001 < p < 0.01) (D) PCA score plots of metabolites in *H. pylori* at different time points (15 min, 30 min, 1 h, 2 h, 4 h and 8 h) to show separation between control groups and 80 µg/mL CBS-treated groups.

**Table S1** Significantly regulated genes in *H. pylori* upon CBS treatment for 12 h.\*

| Gene ID | Gene Description                                                               | Log2FC<br>(20 CBS/Ctrl) | p-adj<br>(20 CBS/Ctrl) | Log2FC<br>(80 CBS/Ctrl) | p-adj<br>(80 CBS/Ctrl) |
|---------|--------------------------------------------------------------------------------|-------------------------|------------------------|-------------------------|------------------------|
| HP0011  | co-chaperone (groES)                                                           | 1.01                    | 1.50E-35               | 1.22                    | 4.08E-09               |
| HP0048  | carbamoyltransferase (hypF)                                                    | -                       | -                      | 0.35                    | 1.99E-02               |
| HP0067  | urease accessory protein (ureH)                                                | 0.53                    | 1.54E-12               | 0.40                    | 1.04E-03               |
| HP0068  | urease accessory protein (ureG)                                                | 0.35                    | 7.52E-06               | -                       | -                      |
| HP0069  | urease accessory protein (ureF)                                                | 0.50                    | 8.33E-07               | 0.68                    | 1.24E-07               |
| HP0070  | urease accessory protein (ureE)                                                | -                       | -                      | 0.42                    | 9.84E-04               |
| HP0144  | cytochrome c oxidase, heme b and copper-binding subunit, membrane-bound (fixN) | -0.31                   | 1.13E-03               | -0.46                   | 4.48E-05               |
| HP0145  | cytochrome c oxidase, monoheme subunit, membrane-bound (fixO)                  | -                       | -                      | -0.31                   | 1.31E-02               |
| HP0146  | cbb3-type cytochrome c oxidase subunit Q (CcoQ)                                | -                       | -                      | -0.96                   | 5.27E-05               |
| HP0147  | cytochrome c oxidase, diheme subunit, membrane-bound (fixP)                    | -                       | -                      | -0.30                   | 1.32E-02               |
| HP0153  | recombinase (recA)                                                             | -0.37                   | 1.64E-06               | -                       | -                      |
| HP0191  | fumarate reductase, iron-sulfur subunit (frdB)                                 | -0.21                   | 3.97E-03               | -0.47                   | 3.41E-05               |
| HP0192  | fumarate reductase, flavoprotein subunit (frdA)                                | -                       | -                      | -0.34                   | 2.63E-03               |
| HP0193  | fumarate reductase, cytochrome b subunit (frdC)                                | -0.52                   | 4.87E-09               | -0.52                   | 3.64E-05               |
| HP0194  | triosephosphate isomerase (tpi)                                                | -0.42                   | 1.49E-05               | -0.43                   | 9.34E-04               |
| HP0198  | nucleoside diphosphate kinase (ndk)                                            | -0.36                   | 6.36E-06               | -0.40                   | 7.42E-04               |
| HP0349  | CTP synthetase (pyrG)                                                          | -0.41                   | 1.49E-07               | -0.35                   | 3.41E-03               |

|        |                                                              |       |          |       |          |
|--------|--------------------------------------------------------------|-------|----------|-------|----------|
| HP0390 | adhesin-thiol peroxidase (tagD)                              | -0.27 | 4.69E-02 | -     | -        |
| HP0557 | acetyl-coenzyme A carboxylase (accA)                         | -     | -        | 0.34  | 2.66E-02 |
| HP0572 | adenine phosphoribosyltransferase (apt)                      | -0.84 | 3.54E-17 | -0.88 | 2.53E-13 |
| HP0621 | DNA mismatch repair protein (MutS)                           | -0.47 | 2.41E-02 | -0.46 | 2.60E-02 |
| HP0653 | nonheme iron-containing ferritin (pfr)                       | 2.40  | 8.83E-34 | 2.56  | 1.33E-33 |
| HP0687 | iron(II) transport protein (feoB)                            | 1.11  | 5.09E-46 | 1.01  | 1.92E-17 |
| HP0807 | iron(III) dicitrate transport protein (fecA)                 | 1.19  | 5.82E-58 | 1.84  | 2.57E-17 |
| HP0824 | thioredoxin (trxA)                                           | -1.01 | 4.42E-55 | -1.07 | 4.20E-22 |
| HP0825 | thioredoxin reductase (trxB)                                 | -0.16 | 1.88E-02 | -0.38 | 1.03E-03 |
| HP0828 | ATP synthase F0, subunit a (atpB)                            | -0.47 | 1.48E-09 | -0.55 | 4.68E-06 |
| HP0869 | hydrogenase expression/formation protein (hypA)              | -0.92 | 8.64E-08 | -0.43 | 1.56E-02 |
| HP0889 | iron(III) dicitrate ABC transporter, permease protein (fecD) | 0.58  | 2.66E-08 | 0.57  | 4.58E-05 |
| HP0900 | hydrogenase expression/formation protein (hypB)              | 0.61  | 2.83E-21 | 0.70  | 2.72E-06 |
| HP0929 | geranyltranstransferase (ispA)                               | -0.35 | 4.33E-03 | -     | -        |
| HP0950 | acetyl-CoA carboxylase beta subunit (accD)                   | 0.33  | 6.24E-06 | 0.50  | 4.39E-02 |
| HP1027 | ferric uptake regulation protein (fur)                       | 0.22  | 2.37E-02 | 0.69  | 1.48E-08 |
| HP1045 | acetyl-CoA synthetase (acoE)                                 | -0.19 | 3.72E-03 | -0.24 | 4.11E-02 |
| HP1077 | nickel transport protein (nixA)                              | -0.66 | 2.77E-19 | -0.57 | 6.85E-07 |
| HP1084 | aspartate transcarbamoylase (pyrB)                           | -0.63 | 1.83E-07 | -0.44 | 3.57E-03 |
| HP1101 | glucose-6-phosphate dehydrogenase (g6pD)                     | -0.72 | 2.54E-18 | -0.59 | 1.23E-06 |
| HP1102 | glucose-6-phosphate 1-dehydrogenase (devB)                   | -0.56 | 3.80E-07 | -0.64 | 2.85E-06 |
| HP1103 | glucokinase (glk)                                            | -0.58 | 4.98E-14 | -0.61 | 2.42E-07 |

|        |                                                                     |       |          |       |          |
|--------|---------------------------------------------------------------------|-------|----------|-------|----------|
| HP1108 | pyruvate ferredoxin oxidoreductase, gamma subunit                   | -0.20 | 1.53E-02 | -0.27 | 2.71E-02 |
| HP1109 | pyruvate ferredoxin oxidoreductase, delta subunit                   | -     | -        | -0.37 | 1.88E-03 |
| HP1110 | pyruvate ferredoxin oxidoreductase, alpha subunit                   | -     | -        | -0.25 | 3.46E-02 |
| HP1123 | peptidyl-prolyl cis-trans isomerase, FKBP-type rotamase (slyD)      | 0.64  | 2.15E-16 | 0.61  | 7.73E-07 |
| HP1131 | ATP synthase F1, subunit epsilon (atpC)                             | 0.61  | 9.82E-04 | -     | -        |
| HP1132 | ATP synthase F1, subunit beta (atpD)                                | 0.29  | 3.83E-05 | -     | -        |
| HP1133 | ATP synthase F1, subunit gamma (atpG)                               | -     | -        | -0.34 | 6.46E-03 |
| HP1134 | ATP synthase F1, subunit alpha (atpA)                               | -     | -        | -0.29 | 1.62E-02 |
| HP1137 | ATP synthase F0, subunit b' (atpF')                                 | -0.56 | 2.95E-09 | -0.47 | 3.22E-04 |
| HP1341 | siderophore-mediated iron transport protein (tonB)                  | 0.46  | 1.31E-08 | 0.56  | 2.72E-06 |
| HP1360 | 4-hydroxybenzoate octaprenyltransferase (ubiA)                      | -0.62 | 4.18E-05 | -     | -        |
| HP1386 | D-ribulose-5-phosphate 3 epimerase (rpe)                            | -1.19 | 2.31E-15 | -0.77 | 1.38E-08 |
| HP1432 | histidine and glutamine-rich protein (hpnl)                         | 0.90  | 4.55E-08 | 2.11  | 6.03E-84 |
| HP1483 | Ubiquinone/menaquinone biosynthesis C-methyltransferase (ubiE)      | -0.31 | 8.36E-03 | -0.31 | 8.36E-03 |
| HP1540 | ubiquinol cytochrome c oxidoreductase, Rieske 2Fe-2S subunit (fbcF) | -0.40 | 7.47E-07 | -0.36 | 3.27E-03 |

\* Only significantly regulated genes mentioned in the manuscript are listed. Adjusted  $p$  value  $< 0.05$  was used as the cutoff value for statistical significance. “-” means the gene was not significantly regulated with adjusted  $p$  values  $> 0.05$ .

**Table S2** Metabolites identified by NMR (12 h CBS treatment).

| Metabolites       | Assignment                | $\delta$ <sup>1</sup> H (ppm)<br>(multiplicity*) | $\delta$ <sup>13</sup> C (ppm) | Correlation coefficients (r) <sup>†</sup>          |                                                    |
|-------------------|---------------------------|--------------------------------------------------|--------------------------------|----------------------------------------------------|----------------------------------------------------|
|                   |                           |                                                  |                                | 20 CBS vs Ctrl                                     | 80 CBS vs Ctrl                                     |
|                   |                           |                                                  |                                | R <sup>2</sup> X = 0.656<br>Q <sup>2</sup> = 0.962 | R <sup>2</sup> X = 0.737<br>Q <sup>2</sup> = 0.960 |
| 3-Hydroxybutyrate | $\alpha$ -CH <sub>2</sub> | 2.30(dd)                                         | 49.7                           | -0.84                                              | -0.69                                              |
|                   | $\beta$ -CH               | 4.16(m)                                          | 69.1                           |                                                    |                                                    |
|                   | $\gamma$ -CH <sub>3</sub> | 1.19(d)                                          | 24.6                           |                                                    |                                                    |
|                   | COOH                      |                                                  | 183.3                          |                                                    |                                                    |
| Acetamide         | CH <sub>3</sub>           | 1.99(s)                                          | 24.0                           | -0.88                                              | -0.92                                              |
|                   | CO                        |                                                  | 176.3                          |                                                    |                                                    |
| Acetate           | CH <sub>3</sub>           | 1.92(s)                                          | 26.6                           | 0.78                                               | -                                                  |
|                   | COOH                      |                                                  | 185.3                          |                                                    |                                                    |
| Alanine           | $\alpha$ -CH              | 3.79(q)                                          | 53.5                           | -0.86                                              | -0.87                                              |
|                   | $\beta$ -CH <sub>3</sub>  | 1.48(d)                                          | 20.0                           |                                                    |                                                    |
|                   | COOH                      |                                                  | 178.2                          |                                                    |                                                    |
| Allantoin         | CH                        | 5.36(s)                                          | 66.3                           | -                                                  | 0.78                                               |
| Arginine          | $\alpha$ -CH              | 3.76(m)                                          | 57.0                           | -0.74                                              | -0.77                                              |
|                   | $\beta$ -CH <sub>2</sub>  | 1.90(m)                                          | 30.5                           |                                                    |                                                    |
|                   | $\gamma$ -CH <sub>2</sub> | 1.70(m)                                          | 26.5                           |                                                    |                                                    |
|                   | $\delta$ -CH <sub>2</sub> | 3.21(t)                                          | 43.4                           |                                                    |                                                    |
|                   | C=NH                      |                                                  | 159.5                          |                                                    |                                                    |
|                   | COOH                      |                                                  | 177.2                          |                                                    |                                                    |



|                |                            |          |       |       |       |
|----------------|----------------------------|----------|-------|-------|-------|
| Aspartate      | $\beta$ -CH <sub>2</sub>   | 2.68(dd) | 39.3  | -     | -     |
|                | $\beta$ -CH <sub>2</sub> ' | 2.83(dd) | 39.9  |       |       |
|                | $\alpha$ -COOH             |          | 176.4 |       |       |
|                | $\beta$ -COOH              |          | 180.2 |       |       |
| Betaine        | CH <sub>3</sub>            | 3.27(s)  | 56.2  | -0.85 | -0.9  |
|                | CH <sub>2</sub>            | 3.91(s)  | 69.8  |       |       |
|                | COO <sup>-</sup>           |          | 172.0 |       |       |
| Formate        | CH                         | 8.46(s)  | 173.4 | 0.73  | 0.76  |
| Fumarate       | CH                         | 6.52(s)  | 139.6 | -0.66 | -0.74 |
|                | COOH                       |          | 177.5 |       |       |
| Galactarate    | C1H                        | 3.94(s)  | 69.9  | -     | -     |
|                | C2H                        | 4.25(s)  | 73.8  |       |       |
| Glutamate      | $\alpha$ -CH               | 3.76(m)  | 57.2  | -0.94 | -0.97 |
|                | $\beta$ -CH <sub>2</sub>   | 2.05(m)  | 29.0  |       |       |
|                | $\gamma$ -CH <sub>2</sub>  | 2.35(dd) | 35.4  |       |       |
|                | $\alpha$ -COOH             |          | 177.2 |       |       |
| Glycine        | CH <sub>2</sub>            | 3.56(s)  | 43.8  | -     | -     |
|                | COOH                       |          | 175.3 |       |       |
| Guanidoacetate | CH <sub>2</sub>            | 3.78(s)  | 47.0  | -     | -     |
|                | C=NH                       |          | 159.6 |       |       |
|                | COOH                       |          | 177.9 |       |       |
| Hypoxanthine   | C1H                        | 8.20(s)  | 147.8 | -     | -0.74 |
|                | C2H                        | 8.21(s)  | 144.5 |       |       |

|                   |                   |          |       |       |       |
|-------------------|-------------------|----------|-------|-------|-------|
| Inosine           | CH <sub>2</sub>   | 3.84(dd) | 64.2  | 0.64  | 0.80  |
|                   | CH <sub>2</sub> ' | 3.92(dd) | 63.8  |       |       |
|                   | 5-H'              | 4.29(dd) | 87.1  |       |       |
|                   | 4-H'              | 4.44(dd) | 73.7  |       |       |
|                   | 3-H'              | 4.78(t)  | 74.6  |       |       |
|                   | 2-H'              | 6.10(d)  | 91.3  |       |       |
|                   | 8-H'              | 8.24(s)  | 150.4 |       |       |
|                   | 2-H               | 8.35(s)  | 144.5 |       |       |
| Lactate           | α-CH              | 4.11(q)  | 69.3  | -0.73 | -0.88 |
|                   | β-CH <sub>3</sub> | 1.33(d)  | 21.5  |       |       |
|                   | α-COOH            |          | 184.3 |       |       |
| Methanol          | CH <sub>3</sub>   | 3.36(s)  | 51.3  | -0.80 | -0.83 |
| NAD <sup>+</sup>  | 2'-CH             | 6.04(d)  | 86.5  | -0.76 | -0.89 |
|                   | 2'''-CH           | 6.09(d)  | 102.6 |       |       |
|                   | 5-CH              | 8.17(dd) | 130.1 |       |       |
|                   | 2''-CH            | 8.43(s)  | 143.3 |       |       |
|                   | 6-CH              | 8.83(d)  | 150.1 |       |       |
|                   | 4-CH              | 9.14(d)  | 145.5 |       |       |
|                   | 2-CH              | 9.34(s)  | 143.0 |       |       |
| NADP <sup>+</sup> | 2'''-CH           | 6.10(d)  | 102.6 | -     | -     |
|                   | 7''-CH            | 8.14(dd) | 132.3 |       |       |
|                   | 2''-CH            | 8.42(s)  | 142.9 |       |       |
|                   | 6-CH              | 8.82(d)  | 145.0 |       |       |
|                   | 4-CH              | 9.10(d)  | 146.0 |       |       |
|                   | 2-CH              | 9.30(s)  | 142.1 |       |       |
| Nicotinate        | C1H               | 8.25(m)  | 141.2 | 0.96  | -     |
|                   | C2H               | 8.62(dd) | 153.4 |       |       |
|                   | C3H               | 8.94(d)  | 152.0 |       |       |
|                   | C4H               | 7.52(dd) | 127.3 |       |       |

|            |                             |          |       |       |       |
|------------|-----------------------------|----------|-------|-------|-------|
| Ornithine  | $\alpha$ -CH                | 3.8(t)   | 54.5  | -0.92 | -0.95 |
|            | $\beta$ -CH <sub>2</sub>    | 1.84(m)  | 27.6  |       |       |
|            | $\gamma$ -CH <sub>2</sub>   | 1.94(m)  | 30.2  |       |       |
|            | $\delta$ -CH <sub>2</sub>   | 3.05(t)  | 40.5  |       |       |
| Proline    | $\alpha$ -CH                | 4.12(dd) | 64.0  | -     | -     |
|            | $\gamma$ -CH <sub>2</sub>   | 2.01(m)  | 26.6  |       |       |
|            | $\delta$ -CH <sub>2</sub>   | 3.34(m)  | 49.0  |       |       |
|            | $\delta$ -CH <sub>2</sub> ' | 3.42(m)  | 49.0  |       |       |
|            | COOH                        |          | 176.1 |       |       |
| Pyruvate   | CH <sub>3</sub>             | 2.37(s)  | 29.2  | -0.91 | -0.95 |
|            | C=O                         |          | 173.4 |       |       |
|            | COOH                        |          | 207.9 |       |       |
| Succinate  | CH <sub>2</sub>             | 2.4(s)   | 36.9  | -     | -0.82 |
|            | COOH                        |          | 182.5 |       |       |
| Uracil     | CH                          | 5.81(d)  | 102.5 | -0.75 | -0.84 |
|            | CH'                         | 7.54(d)  | 145.0 |       |       |
|            | C=O                         |          | 155.9 |       |       |
| Valine     | $\alpha$ -CH                | 3.61(d)  | 62.3  | -     | -     |
|            | $\beta$ -CH                 | 2.28(m)  | 31.2  |       |       |
|            | $\gamma$ -CH <sub>3</sub>   | 0.98(d)  | 19.4  |       |       |
|            | $\gamma'$ -CH <sub>3</sub>  | 1.03(d)  | 20.7  |       |       |
|            | COOH                        |          | 177.3 |       |       |
| Xanthosine | CH <sub>2</sub>             | 3.82(m)  | 62.2  | -     | -     |
|            | C1H                         | 5.85(d)  | 92.1  |       |       |
|            | C2H                         | 4.69(t)  | 73.4  |       |       |
|            | C3H                         | 4.38(dd) | 73.1  |       |       |
|            | C4H                         | 4.25(q)  | 86.0  |       |       |
|            | C5H                         | 7.87(s)  | 145.5 |       |       |

|                  |                           |         |        |   |   |
|------------------|---------------------------|---------|--------|---|---|
| $\beta$ -Alanine | $\alpha$ -CH <sub>2</sub> | 2.54(t) | 35.10  |   |   |
|                  | $\beta$ -CH <sub>2</sub>  | 3.17(t) | 39.09  | - | - |
|                  | COOH                      |         | 176.23 |   |   |

\* Multiplicity: singlet (s), doublet (d), triplet (t), quartet (q), doublet of doublets (dd), multiplet (m).

† Positive and negative values of correlation coefficient values indicate positive and negative correlations in metabolite concentrations respectively, by comparing the CBS treatment group with the control group.  $p < 0.05$  and  $|r| > 0.602$  was used as the cutoff values for statistical significance. “-” means the correlation coefficient is less than the cutoff value.

**Table S3** Metabolites identified by GC-MS and their regulations by CBS at different time points.

| Identified Compound                | Match Factor | PubChem CID | KEGG Entry | <i>p</i> -values (Ctrl vs CBS treatment)* |              |              |                 |              |                 |                 |
|------------------------------------|--------------|-------------|------------|-------------------------------------------|--------------|--------------|-----------------|--------------|-----------------|-----------------|
|                                    |              |             |            | 15 min                                    | 30 min       | 1 h          | 2 h             | 4 h          | 8 h             | 12 h            |
| Lactic acid (2TMS)                 | 94.15        | 107689      | C00186     | 0.707                                     | 0.171        | <b>0.015</b> | <b>1.03E-05</b> | 0.127        | 0.473           | <b>0.000</b>    |
| Norvaline (1TMS)                   | 98.96        | 439575      | C01799     | 0.414                                     | 0.316        | 0.643        | 0.943           | 0.744        | 0.404           | <b>0.002</b>    |
| Alanine (3TMS)                     | 99.84        | 5950        | C00041     | <b>0.021</b>                              | 0.271        | 0.355        | 0.501           | 0.622        | 0.161           | <b>0.017</b>    |
| Oxalic acid (2TMS)                 | 81.30        | 971         | C00209     | <b>0.005</b>                              | 0.652        | 0.489        | 0.067           | <b>0.001</b> | <b>0.043</b>    | 0.505           |
| Leucine (1TMS)                     | 99.81        | 6106        | C00123     | 0.190                                     | 0.198        | 0.630        | 0.854           | 0.463        | 0.307           | <b>0.017</b>    |
| Isoleucine (1TMS)                  | 99.21        | 6306        | C00407     | 0.445                                     | <b>0.015</b> | <b>0.046</b> | 0.333           | 0.762        | 0.067           | <b>0.031</b>    |
| Valine (2TMS)                      | 99.76        | 6287        | C00183     | 0.426                                     | 0.624        | 0.409        | 0.110           | 0.251        | <b>0.006</b>    | <b>0.001</b>    |
| Serine (2TMS)                      | 98.34        | 5951        | C00065     | 0.215                                     | 0.555        | 0.902        | 0.387           | 0.350        | 0.248           | <b>0.000</b>    |
| Norleucine (2TMS)                  | 99.32        | 21236       | C01933     | <b>0.035</b>                              | <b>0.040</b> | 0.603        | 0.481           | 0.723        | 0.069           | 0.236           |
| Phosphoric acid (3TMS)             | 95.61        | 1004        | C00009     | 0.626                                     | <b>0.015</b> | 0.516        | 0.250           | 0.694        | 0.087           | <b>0.041</b>    |
| Glycerol (3TMS)                    | 97.27        | 753         | C00116     | 0.147                                     | <b>0.004</b> | 0.843        | 0.535           | 0.337        | 0.069           | <b>0.002</b>    |
| 2-Piperidinecarboxylic acid (2TMS) | 96.61        | 849         | C00408     | <b>1.33E-04</b>                           | <b>0.043</b> | 0.784        | 0.230           | 0.536        | 0.374           | 0.553           |
| Proline (2TMS)                     | 99.80        | 145742      | C00148     | 0.291                                     | 0.676        | 0.458        | 0.724           | 0.516        | <b>0.009</b>    | <b>1.24E-04</b> |
| Glycine (3TMS)                     | 97.24        | 750         | C00037     | 0.283                                     | <b>0.008</b> | 0.529        | 0.899           | 0.177        | 0.068           | <b>0.003</b>    |
| Succinic acid (2TMS)               | 96.69        | 1110        | C00042     | 0.636                                     | <b>0.017</b> | 0.352        | 0.163           | <b>0.049</b> | <b>0.009</b>    | 0.450           |
| Glyceric acid (3TMS)               | 95.06        | 439194      | C00258     | 0.713                                     | 0.604        | 0.212        | 0.973           | 0.096        | 0.100           | <b>0.020</b>    |
| Uracil (2TMS)                      | 94.93        | 1174        | C00106     | 0.503                                     | 0.113        | 0.508        | 0.617           | 0.944        | <b>0.028</b>    | <b>0.009</b>    |
| Pyrazine (2TMS)                    | 85.71        | 9261        | C02018     | 0.825                                     | 0.440        | 0.642        | 0.186           | 0.725        | 0.058           | <b>0.010</b>    |
| Fumaric acid (2TMS)                | 96.93        | 444972      | C00122     | 0.304                                     | 0.091        | 0.080        | 0.561           | 0.096        | <b>1.37E-04</b> | <b>5.87E-04</b> |

|                                   |       |        |        |              |                 |              |              |              |              |                 |
|-----------------------------------|-------|--------|--------|--------------|-----------------|--------------|--------------|--------------|--------------|-----------------|
| Thymine (2TMS)                    | 78.49 | 1135   | C00178 | 0.720        | <b>0.013</b>    | 0.879        | 0.592        | 0.128        | 0.086        | <b>0.035</b>    |
| Threonine (3TMS)                  | 96.88 | 6288   | C00188 | 0.548        | <b>0.037</b>    | 0.822        | 0.886        | 0.107        | 0.084        | 0.385           |
| Methionine (1TMS)                 | 99.18 | 6137   | C00073 | 0.303        | 0.977           | 0.387        | 0.756        | 0.584        | 0.062        | <b>0.008</b>    |
| 3-Deoxytetronic acid (3TMS)       | 96.43 | 192742 | -      | 0.817        | <b>0.007</b>    | 0.994        | 0.227        | 0.744        | 0.140        | <b>0.019</b>    |
| Aspartic acid (2TMS)              | 98.31 | 5960   | C00049 | <b>0.047</b> | 0.866           | 0.676        | 0.347        | 0.212        | 0.393        | 0.892           |
| Beta-Alanine (3TMS)               | 94.49 | 239    | C00099 | 0.366        | 0.956           | <b>0.016</b> | 0.926        | 0.406        | <b>0.003</b> | <b>3.12E-04</b> |
| 3,4-Dihydroxybutanoic acid (3TMS) | 93.99 | 150929 | -      | 0.767        | 0.315           | 0.827        | 0.161        | 0.742        | 0.135        | <b>0.017</b>    |
| Homoserine (3TMS)                 | 96.40 | 12647  | C00263 | <b>0.015</b> | 0.192           | <b>0.008</b> | 0.482        | <b>0.009</b> | <b>0.022</b> | <b>6.21E-04</b> |
| 2-Piperidone (2TMS)               | 89.68 | 12665  | -      | 0.075        | 0.281           | 0.219        | 0.437        | <b>0.001</b> | 0.163        | <b>0.027</b>    |
| Aminomalonic acid (3TMS)          | 96.22 | 100714 | C00872 | 0.075        | 0.188           | 0.108        | 0.084        | 0.151        | 0.189        | <b>8.51E-04</b> |
| Malic acid (3TMS)                 | 94.36 | 525    | C00711 | 0.202        | 0.894           | 0.516        | 0.139        | 0.758        | 0.097        | <b>0.030</b>    |
| Parabanic acid (2TMS)             | 98.68 | 67126  | -      | 0.550        | <b>0.005</b>    | 0.874        | <b>0.021</b> | <b>0.017</b> | <b>0.001</b> | <b>0.022</b>    |
| N-Acetylmethionine (2TMS)         | 97.45 | 6180   | C02712 | 0.706        | <b>1.39E-05</b> | <b>0.015</b> | 0.759        | <b>0.023</b> | <b>0.005</b> | <b>0.010</b>    |
| Pyroglutamic acid (2TMS)          | 89.74 | 7405   | C01879 | 0.884        | <b>0.016</b>    | 0.192        | <b>0.017</b> | 0.568        | 0.246        | 0.063           |
| 4-Aminobutanoic acid (3TMS)       | 97.00 | 119    | C00334 | 0.626        | <b>0.002</b>    | <b>0.025</b> | 0.070        | 0.102        | 0.705        | <b>0.014</b>    |
| Phenylalanine (1TMS)              | 99.49 | 6140   | C00079 | 0.469        | <b>0.018</b>    | 0.155        | 0.988        | 0.735        | <b>0.019</b> | <b>0.024</b>    |
| Cysteine (3TMS)                   | 90.48 | 5862   | C00097 | <b>0.018</b> | 0.592           | 0.514        | 0.263        | 0.757        | <b>0.006</b> | <b>0.001</b>    |
| Threonic acid (4TMS)              | 88.10 | 151152 | C01620 | 0.266        | 0.631           | 0.377        | 0.667        | <b>0.038</b> | <b>0.010</b> | <b>0.031</b>    |

|                                |       |         |        |              |                 |                 |                 |                 |                 |                 |
|--------------------------------|-------|---------|--------|--------------|-----------------|-----------------|-----------------|-----------------|-----------------|-----------------|
| 2-Oxo-Glutaric acid (2TMS)     | 77.45 | 51      | C00026 | 0.914        | <b>0.036</b>    | 0.806           | 0.617           | 0.156           | 0.089           | 0.386           |
| Asparagine (2TMS)              | 74.67 | 6267    | C00152 | <b>0.042</b> | 0.732           | 0.979           | 0.617           | 0.279           | <b>0.004</b>    | 0.904           |
| Butanoic acid (2TMS)           | 78.84 | 264     | C00246 | 0.290        | 0.633           | 0.111           | 0.462           | 0.241           | 0.177           | <b>0.026</b>    |
| Ornithine (3TMS)               | 98.39 | 6262    | C00077 | 0.074        | 0.624           | 0.323           | 0.759           | 0.355           | <b>0.007</b>    | 0.587           |
| Glutamic acid (3TMS)           | 89.74 | 33032   | C00025 | 0.222        | 0.538           | 0.216           | 0.741           | 0.422           | <b>0.008</b>    | 0.201           |
| Gluconic acid (5TMS)           | 88.49 | 10690   | C00257 | 0.662        | 0.165           | 0.151           | 0.212           | <b>0.047</b>    | <b>0.004</b>    | <b>1.99E-04</b> |
| Adenine (2TMS)                 | 72.10 | 190     | C00147 | 0.727        | <b>3.10E-05</b> | 0.072           | 0.526           | 0.056           | 0.127           | <b>0.007</b>    |
| Arabinose (4TMS)               | 97.99 | 439195  | C00259 | 0.094        | <b>0.005</b>    | 0.401           | 0.179           | <b>1.65E-04</b> | 0.108           | <b>3.33E-04</b> |
| Glycerol-3-phosphate (4TMS)    | 91.18 | 439162  | C00093 | 0.114        | 0.177           | 0.152           | 0.857           | 0.758           | <b>0.018</b>    | <b>0.001</b>    |
| Ribofuranose (4TMS)            | 97.45 | 5779    | C00121 | 0.534        | 0.985           | <b>0.005</b>    | 0.540           | 0.337           | <b>0.029</b>    | <b>0.001</b>    |
| Ribonic acid (4TMS)            | 79.49 | 5460677 | C01685 | <b>0.025</b> | 0.731           | 0.371           | 0.218           | 0.328           | <b>0.014</b>    | 0.052           |
| Ethanolaminephosphate (4TMS)   | 84.24 | 1015    | C00346 | 0.081        | <b>0.024</b>    | 0.338           | 0.327           | 0.094           | <b>6.89E-04</b> | <b>7.01E-04</b> |
| L-Val-L-leu(1TMS)              | 99.00 | 352039  | -      | 0.962        | <b>0.011</b>    | 0.093           | 0.394           | 0.490           | <b>4.03E-04</b> | 0.309           |
| Hypoxanthine (2TMS)            | 95.94 | 790     | C00262 | <b>0.040</b> | 0.243           | <b>4.77E-08</b> | 0.525           | 0.925           | 0.237           | <b>0.025</b>    |
| Fructofuranose (5TMS)          | 97.04 | 439709  | C02336 | 0.199        | 0.170           | <b>0.002</b>    | 0.392           | 0.531           | 0.654           | 0.792           |
| Citric acid (4TMS)             | 95.52 | 311     | C00158 | <b>0.001</b> | <b>1.12E-09</b> | <b>4.1E-10</b>  | <b>2.69E-10</b> | <b>1.00E-06</b> | <b>5.33E-05</b> | <b>8.34E-07</b> |
| Citrulline (4TMS)              | 97.68 | 9750    | C00327 | 0.597        | 0.223           | 0.666           | 0.353           | 0.319           | <b>2.48E-04</b> | 0.206           |
| N-alpha-Acetyl-L-Lysine (3TMS) | 97.88 | 192590  | C12989 | 0.250        | <b>0.039</b>    | 0.353           | 0.311           | 0.831           | <b>0.021</b>    | <b>0.004</b>    |
| Arabino-Hexonic acid (5TMS)    | 91.65 | 152990  | -      | 0.121        | 0.272           | <b>0.002</b>    | 0.681           | 0.912           | <b>0.011</b>    | <b>0.005</b>    |

|                          |       |          |        |                 |                 |              |              |              |                 |                 |
|--------------------------|-------|----------|--------|-----------------|-----------------|--------------|--------------|--------------|-----------------|-----------------|
| Fructose (5TMS)          | 98.38 | 5984     | C01496 | <b>5.95E-05</b> | 0.906           | 0.896        | 0.828        | 0.691        | <b>0.022</b>    | <b>0.017</b>    |
| Tyrosine (2TMS)          | 99.62 | 6057     | C00082 | 0.091           | <b>0.014</b>    | 0.090        | 0.737        | 0.484        | <b>0.015</b>    | 0.149           |
| Mannose (5TMS)           | 97.84 | 18950    | C00159 | 0.179           | <b>0.010</b>    | <b>0.013</b> | <b>0.018</b> | 0.933        | <b>0.049</b>    | 0.424           |
| Glucose (5TMS)           | 96.42 | 5793     | C00031 | 0.135           | <b>0.007</b>    | <b>0.009</b> | <b>0.033</b> | 0.235        | <b>0.031</b>    | <b>0.025</b>    |
| Lysine (4TMS)            | 98.55 | 5962     | C00047 | <b>8.58E-05</b> | 0.197           | 0.535        | 0.175        | 0.752        | 0.124           | 0.159           |
| Lactulose (8TMS)         | 85.37 | 11333    | C07064 | <b>0.023</b>    | <b>0.007</b>    | <b>0.006</b> | 0.231        | 0.143        | <b>1.54E-04</b> | <b>9.98E-05</b> |
| Inositol (6TMS)          | 84.08 | 892      | C00137 | 0.141           | 0.298           | 0.139        | 0.298        | 0.108        | <b>0.013</b>    | <b>0.036</b>    |
| Hexadecanoic acid (1TMS) | 94.08 | 985      | C00249 | 0.123           | <b>1.41E-05</b> | 0.870        | 0.844        | <b>0.003</b> | <b>0.041</b>    | 0.472           |
| Myo-Inositol (6TMS)      | 94.89 | 892      | C00137 | 0.858           | 0.733           | 0.177        | 0.810        | 0.801        | 0.127           | <b>0.001</b>    |
| Decanedioic acid (2TMS)  | 87.47 | 5192     | C08277 | 0.165           | <b>6.61E-04</b> | 0.350        | 0.993        | 0.736        | <b>0.022</b>    | <b>3.39E-04</b> |
| Tryptophan (3TMS)        | 99.00 | 6305     | C00078 | <b>4.02E-04</b> | <b>9.55E-05</b> | 0.880        | 0.122        | 0.580        | <b>0.027</b>    | 0.217           |
| Octadecanoic acid (1TMS) | 93.59 | 5281     | C01530 | 0.626           | <b>2.05E-04</b> | 0.970        | 0.523        | <b>0.006</b> | 0.074           | 0.335           |
| Allose (5TMS)            | 98.21 | 12285879 | C01487 | 0.158           | 0.995           | 0.772        | 0.282        | <b>0.016</b> | 0.348           | 0.463           |
| Myristic acid (1TMS)     | 72.90 | 11005    | C06424 | 0.891           | 0.966           | <b>0.006</b> | 0.096        | 0.505        | <b>0.001</b>    | <b>1.12E-04</b> |
| Uridine (3TMS)           | 97.38 | 6029     | C00299 | <b>0.044</b>    | 0.783           | <b>0.043</b> | 0.545        | 0.753        | <b>0.004</b>    | 0.543           |
| Sucrose (8TMS)           | 91.65 | 5988     | C00089 | 0.425           | 0.141           | 0.723        | 0.761        | 0.130        | <b>0.003</b>    | 0.129           |
| Cellobiose (8TMS)        | 97.82 | 10712    | C06422 | 0.369           | 0.365           | 0.528        | 0.421        | 0.486        | <b>0.002</b>    | 0.114           |
| Trehalose (8TMS)         | 93.68 | 7427     | C01083 | 0.125           | 0.434           | 0.487        | 0.878        | 0.125        | <b>0.004</b>    | <b>0.012</b>    |

\* The *p*-values were calculated by comparing the normalized integrated peak areas of each metabolite from control and CBS treatment groups, using two-tailed *t*-test. The *p*-values highlighted in red or green represent the metabolites being up- or down-regulated by CBS at the specific time point.



**Table S4** qRT-PCR primers used in this study.

| Gene ID | Gene        |     | Sequence (5'-3')        |
|---------|-------------|-----|-------------------------|
| HP0026  | <i>gltA</i> | For | TTGTCATTGGCCGAACCGTA    |
|         |             | Rev | ACTTGTCTTGGGCGTGTGAT    |
| HP0027  | <i>icd</i>  | For | AGGCACAGAGAGGCTAGTGA    |
|         |             | Rev | AACGCCCCTTCGGTGTATTT    |
| HP0779  | <i>acnB</i> | For | AAACGCTCCTCCCAGTCAAG    |
|         |             | Rev | AGTGGAAGACGACCGCAT      |
| HP0086  | <i>mgo</i>  | For | TTGCCTTTGGCTCAGAGCAT    |
|         |             | Rev | GGCTGCAAAAGGGAGTTTGG    |
| HP0192  | <i>frdA</i> | For | GGGCATTGATCCGGCTGATA    |
|         |             | Rev | CTTGCCCGTATTCAGGCTCA    |
| HP0191  | <i>frdB</i> | For | CCTGACGAAGCCCAAGAAGT    |
|         |             | Rev | AGGGCGCATGAGTTTAGTCC    |
| HP0193  | <i>frdC</i> | For | GCTATTGTGAGCGTGGTTGC    |
|         |             | Rev | ACAAGCTCGTATCGCCATGT    |
| HP0073  | <i>ureA</i> | For | TGCGGCTGAATTGATGCAAG    |
|         |             | Rev | GGGTATGCACGGTTACGAGT    |
| HP0072  | <i>ureB</i> | For | GTGGCGGTAAAACCCTGAGA    |
|         |             | Rev | TCAGTAGCAGGACCTACGCT    |
| HP0070  | <i>ureE</i> | For | ACCAGGCAAGGCAAAGACAT    |
|         |             | Rev | CGCTCTTGGCTTGGATGTGA    |
| HP0069  | <i>ureF</i> | For | TCAATGATGCGGTGTTCCCT    |
|         |             | Rev | GGAGGGCGCTTTCATAGGTT    |
| HP0068  | <i>ureG</i> | For | ATTCGGTGATGCCACGAGAG    |
|         |             | Rev | AGGTTATCGCCTCCGCTTTC    |
| HP0067  | <i>ureH</i> | For | AATTCAACCGCTTGCACACC    |
|         |             | Rev | ATGCATTCTCGCACACCAGA    |
|         | 16S<br>rRNA | For | GGAGTACGGTCGCAAGATTAAA  |
|         |             | Rev | CTAGCGGATTCTCTCAATGTCAA |

## References

1. C. Trapnell, B. A. Williams, G. Pertea, A. Mortazavi, G. Kwan, M. J. van Baren, S. L. Salzberg, B. J. Wold and L. Pachter, *Nat. Biotech.*, 2010, **28**, 511-515.
2. L. Zhang, L. Wang, Y. Hua, Z. Liu, Y. Tian, X. Wu, Y. Zhao, H. Tang, C. Chen and Y. Wang, *Biomaterials*, 2013, **34**, 7117-7126.
3. J. Li, C. Huang, D. Zheng, Y. Wang and Z. Yuan, *J. Proteome Res.*, 2012, **11**, 4654-4661.
4. B. Peng, Y. Su, H. Li, Y. Han, C. Guo, Y. Tian and X. Peng, *Cell Metab.*, 2015, **21**, 249-261.
5. F. Grimm, L. Fets and D. Anastasiou, *Adv. Exp. Med. Biol.*, 2016, **899**, 59-88.
6. X. Domingo-Almenara, J. Brezmes, M. Vinaixa, S. Samino and O. Yanes, et al., *Anal. Chem.*, 2016, **88**, 9821-9829.
7. J. Xia and D. S. Wishart, in *Current Protocols in Bioinformatics*, John Wiley & Sons, Inc., 2011, 1-48.
